# Supplementary material for: Synthesis and characterization of a hierarchically structured three-dimensional conducting scaffold for highly stable Li metal anodes
Source: Royal Society of Chemistry journal article supplement (doi:10.1039/c9ta03062j), 2019-01-01
Supplement: c9ta03062j1.pdf [file c9ta03062j1.pdf]

Electronic Supplementary Material (ESI) for Journal of Materials Chemistry A.  
This journal is © The Royal Society of Chemistry 2019

## Electronic Supplementary Information

### Synthesis and Characterization of a Hierarchically Structured Three-Dimensional Conducting Scaffold for Highly Stable Li Metal Anodes

Ji Young Kim,<sup>ac</sup> Guicheng Liu,<sup>\*ad</sup> Minh Xuan Tran,<sup>ab</sup> Ryanda Enggar Anugrah Ardhi,<sup>ab</sup> Hansung Kim,<sup>c</sup> and Joong Kee Lee<sup>\*ab</sup>

<sup>a</sup> Center for Energy Storage Research, Clean Energy Institute, Korea Institute of Science and Technology, Hwarang-ro 14-gil 5, Seongbuk-gu, Seoul 02792, Republic of Korea

<sup>b</sup> Department of Energy and Environment Engineering, KIST School, Korea University of Science and Technology, Hwarang-ro 14-gil 5, Seongbuk-gu, Seoul 02792, Republic of Korea

<sup>c</sup> Department of Chemical and Biomolecular Engineering, Yonsei University, 50 Yonsei-ro, Seodaemun-gu, Seoul 03722, Republic of Korea

<sup>d</sup> Department of Physics, Dongguk University, 30 Pildong-ro 1-gil, Jangchung-dong, Jung-gu, Seoul 04620, Republic of Korea

This file contains Supplementary Figures S1-S12 and Tables S1-S6.

\*Corresponding authors: log67@163com, liuguicheng@dongguk.edu (G. Liu);  
leejk@kist.re.kr (J. K. Lee)

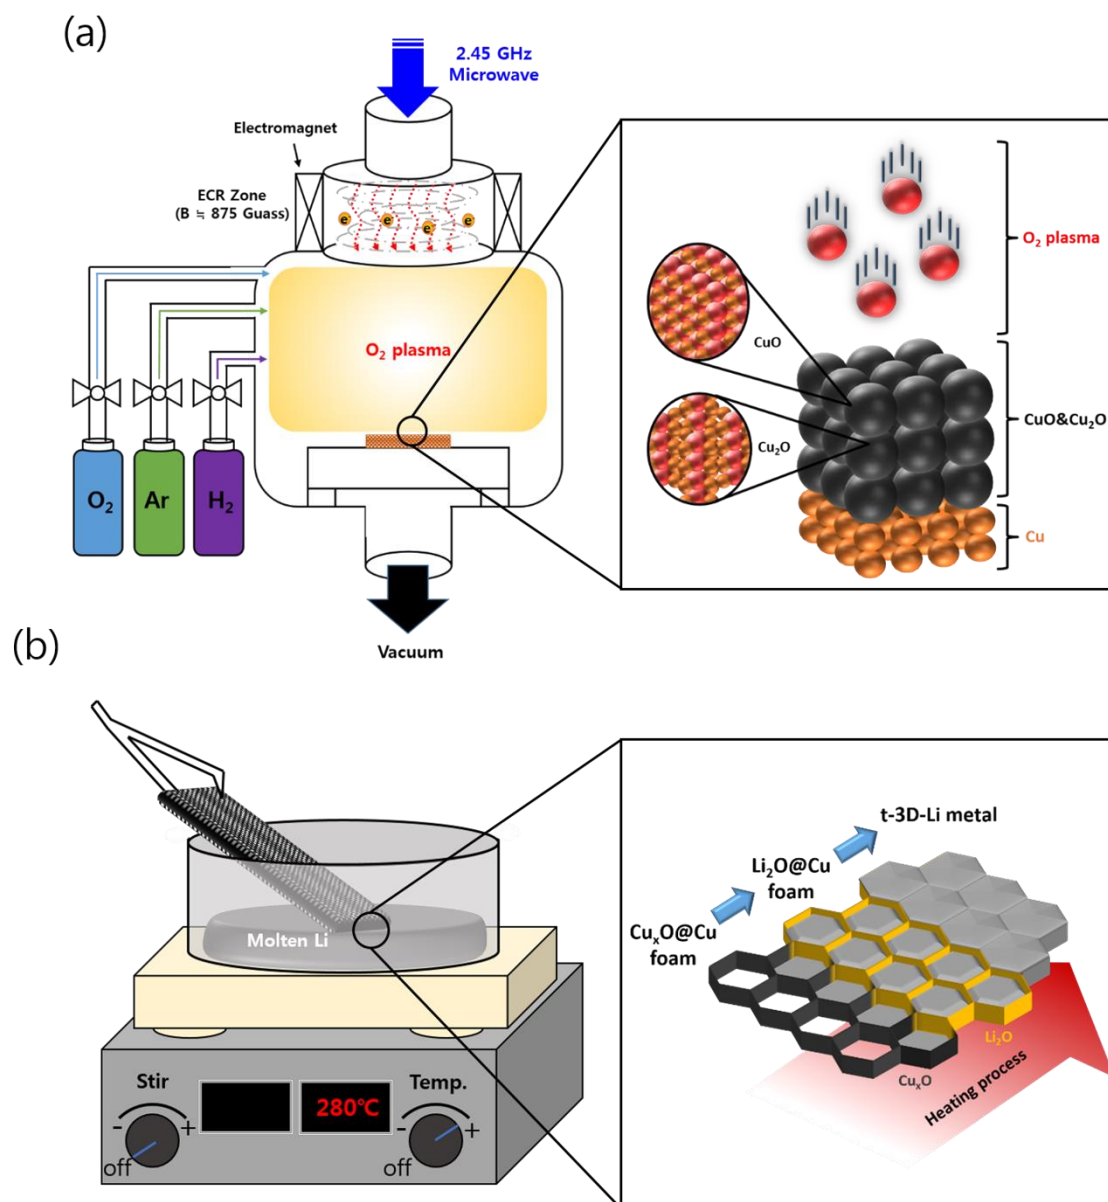

**Figure S1.** Schematic illustration of (a) ECR plasma oxidation used to prepare  $Cu_xO@Cu$  foam and (b) the fabrication of the t-3D-Li metal electrode.

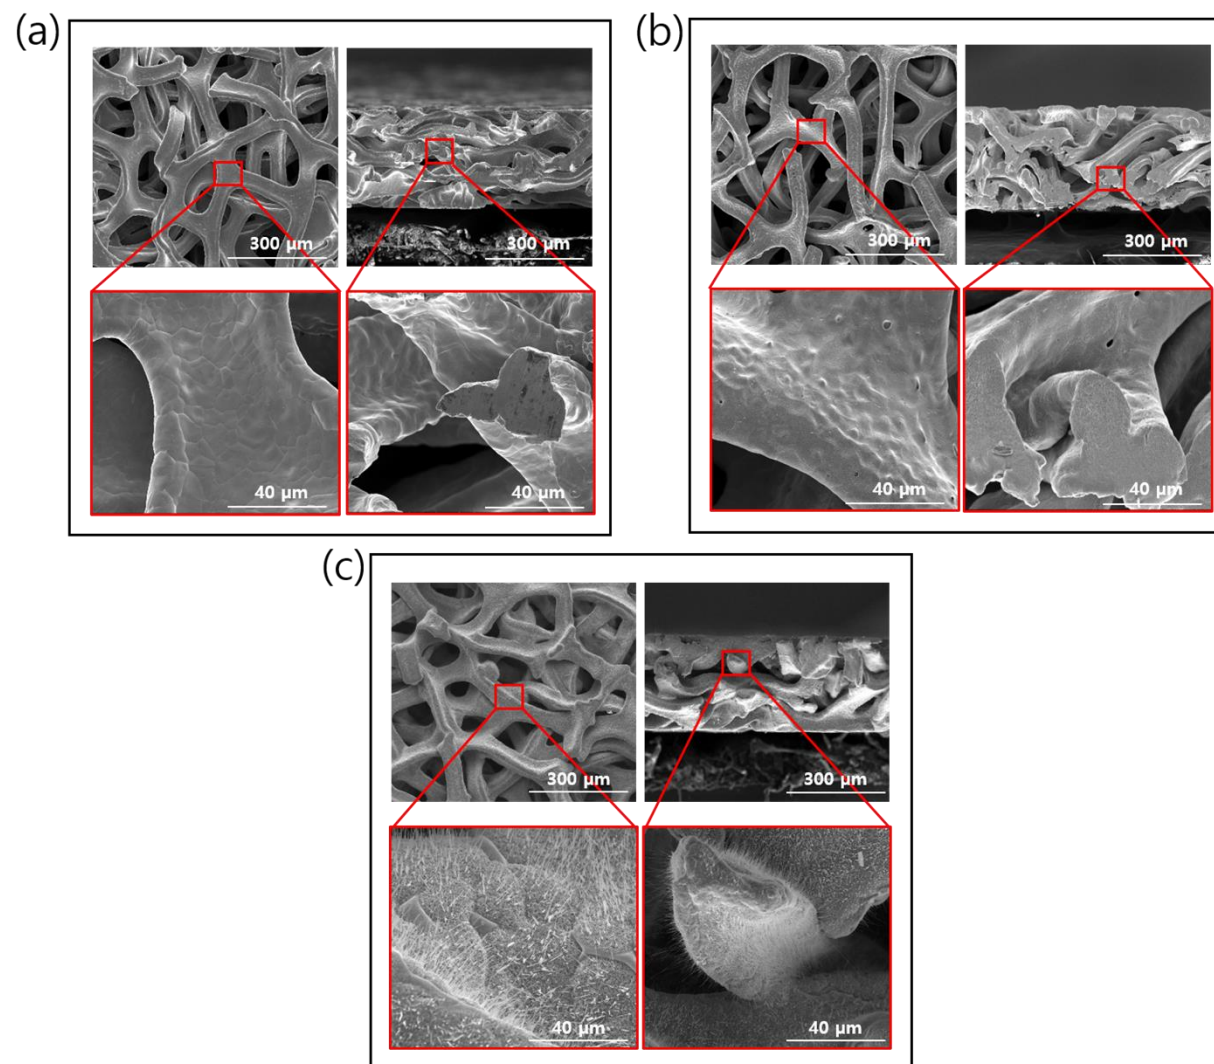

**Figure S2.** Top-view and cross-sectional images of Cu foam subjected to different surface treatments: (a) pristine Cu foam;  $\text{Cu}_x\text{O}@Cu$  foam prepared by (b) ECR  $\text{O}_2$  plasma treatment and (c) heat treatment.

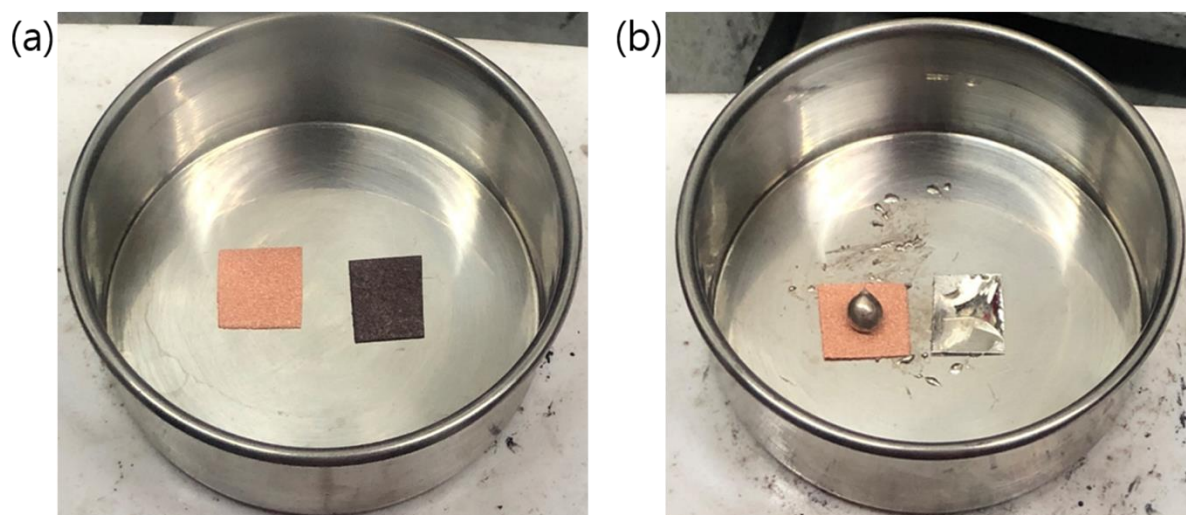

**Figure S3.** Photographs of Cu foam and  $\text{Cu}_x\text{O}@\text{Cu}$  foam (a) before and (b) after Li impregnation at 280 °C.

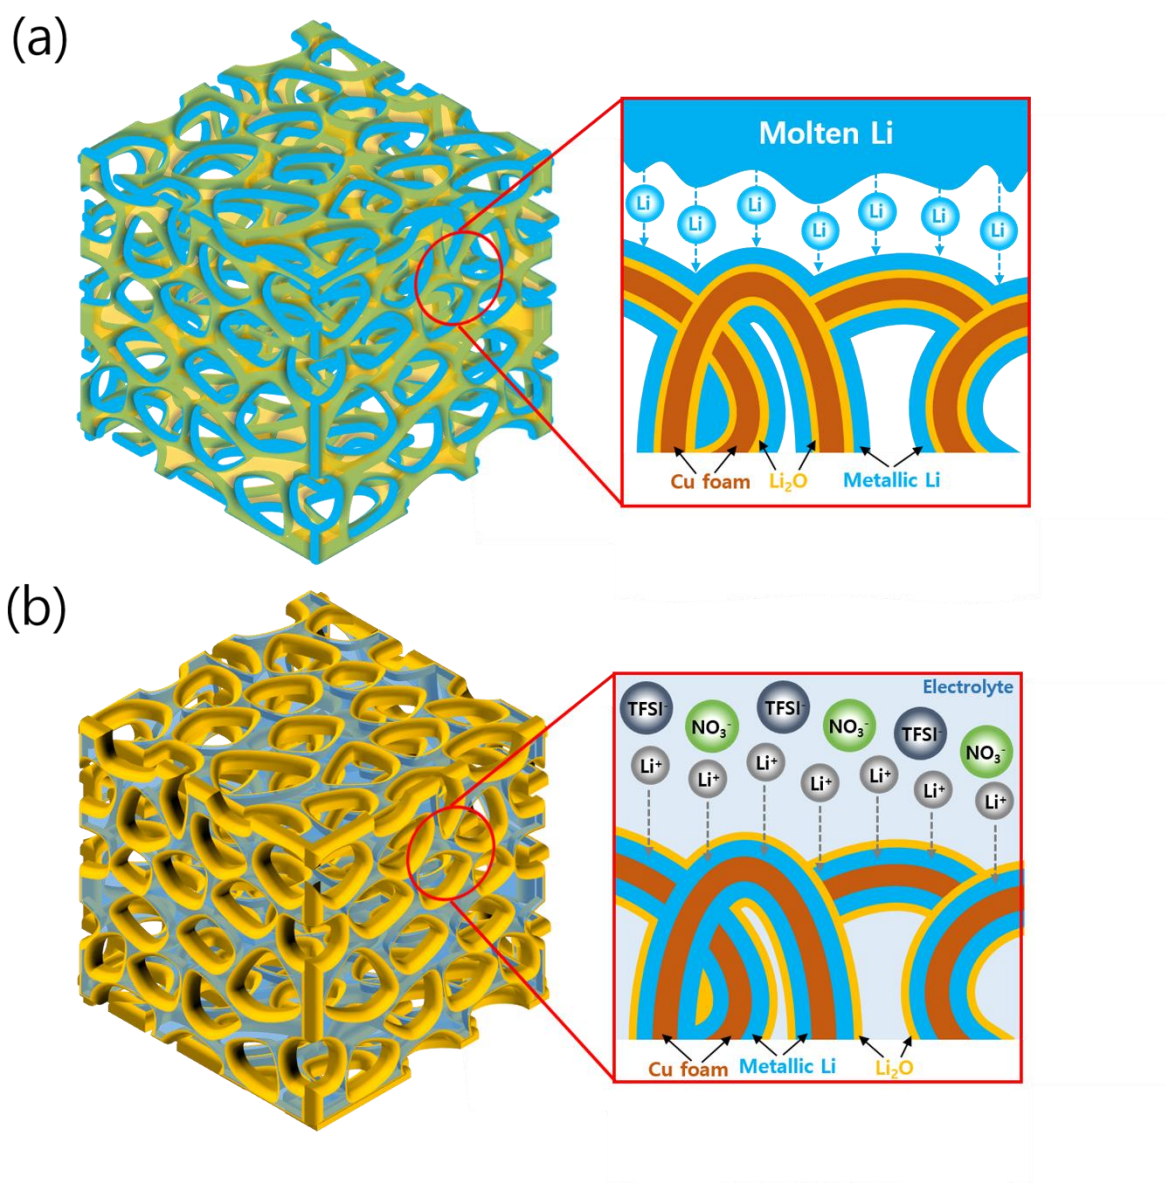

**Figure S4.** Detailed hierarchical structures of (a) t-3D-Li metal and (b) e-3D-Li metal anodes.

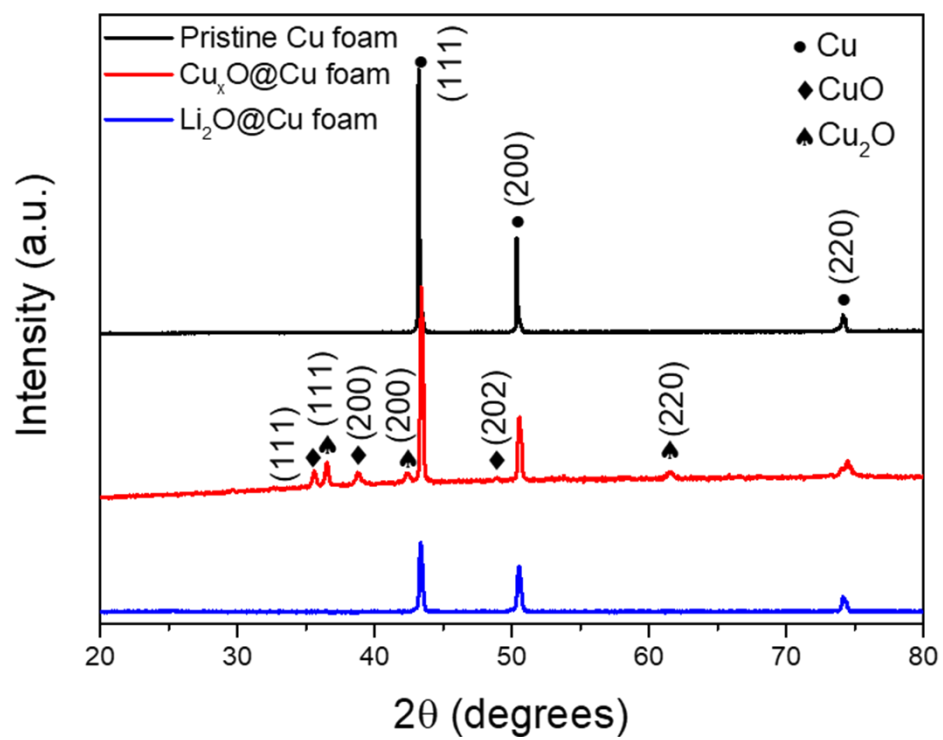

**Figure S5.** XRD patterns of pristine Cu foam,  $\text{Cu}_x\text{O}@Cu$  foam, and  $\text{Li}_2\text{O}@Cu$  foam.



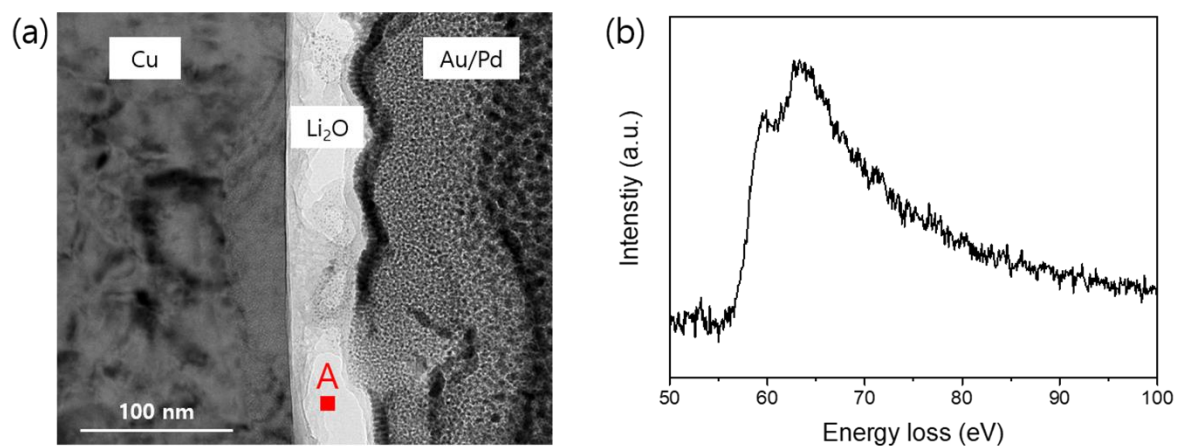

**Figure S6.** (a) HAADF-STEM images of Li<sub>2</sub>O@Cu and (b) EELS analysis of the Li-K edge. (Note: The specimen was sputter-coated with Au/Pd to avoid damage and surface charge under the Ga<sup>+</sup> ion beam.)

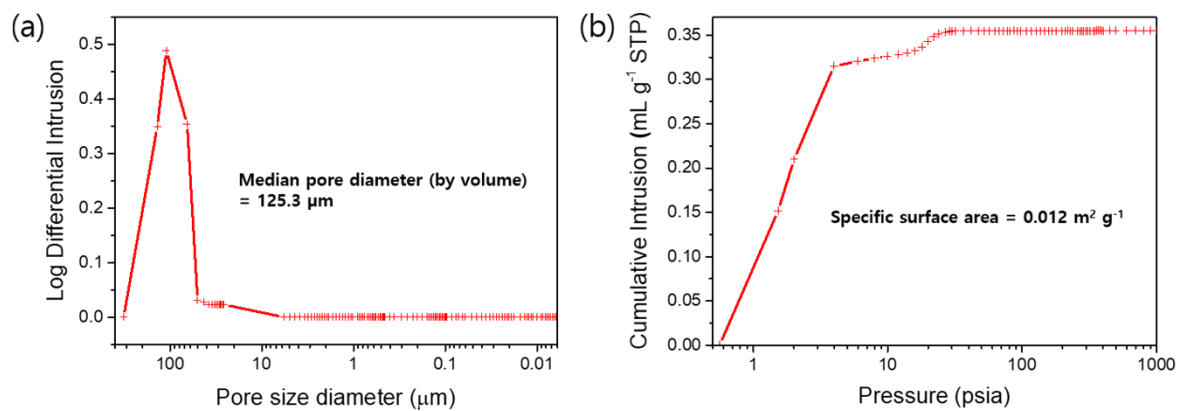

**Figure S7.** (a) Pore size distribution and (b) intrusion curve of Cu foam determined by Hg porosimetry.



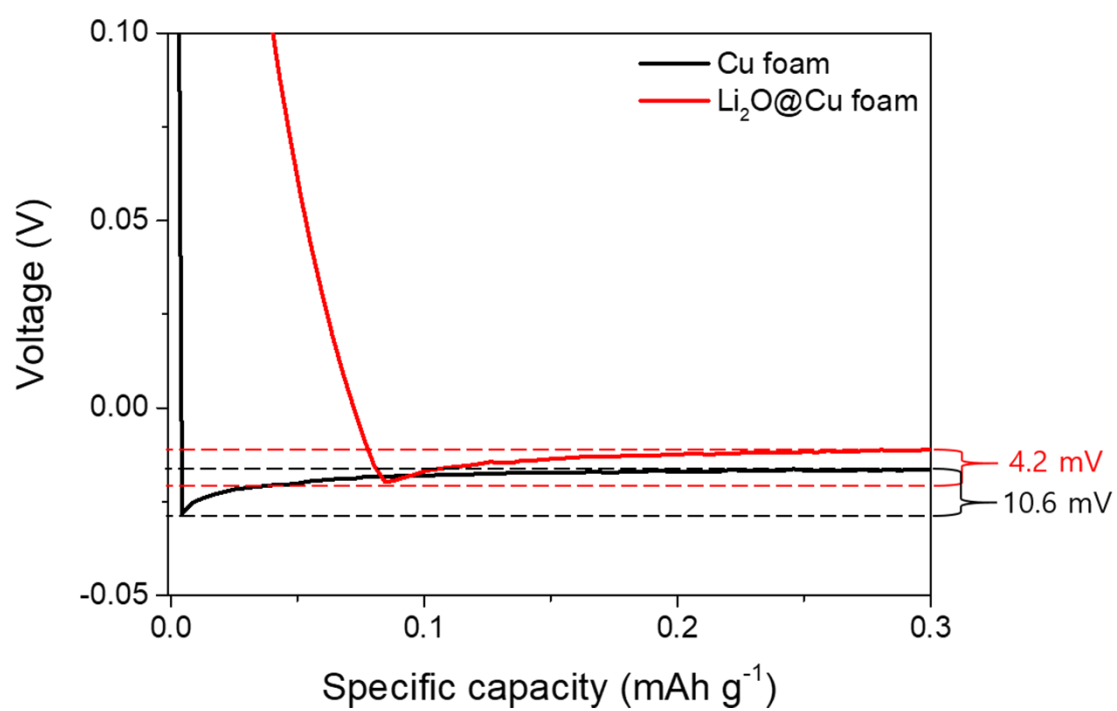

**Figure S8.** Voltage profiles of Cu foam and Li<sub>2</sub>O@Cu foam recorded at a current density of 0.5 mA cm<sup>-2</sup>.

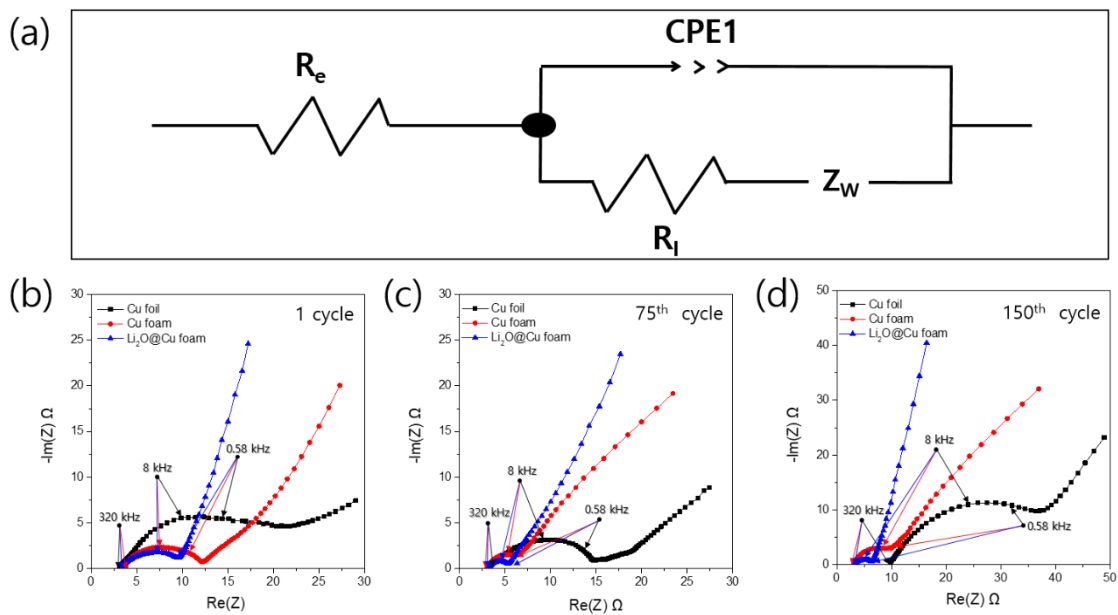

**Figure S9.** (a) Equivalent circuit curve for Nyquist plots of Li/Cu cells. (b, c, d) The corresponding Nyquist plots with frequency information at different cycle.

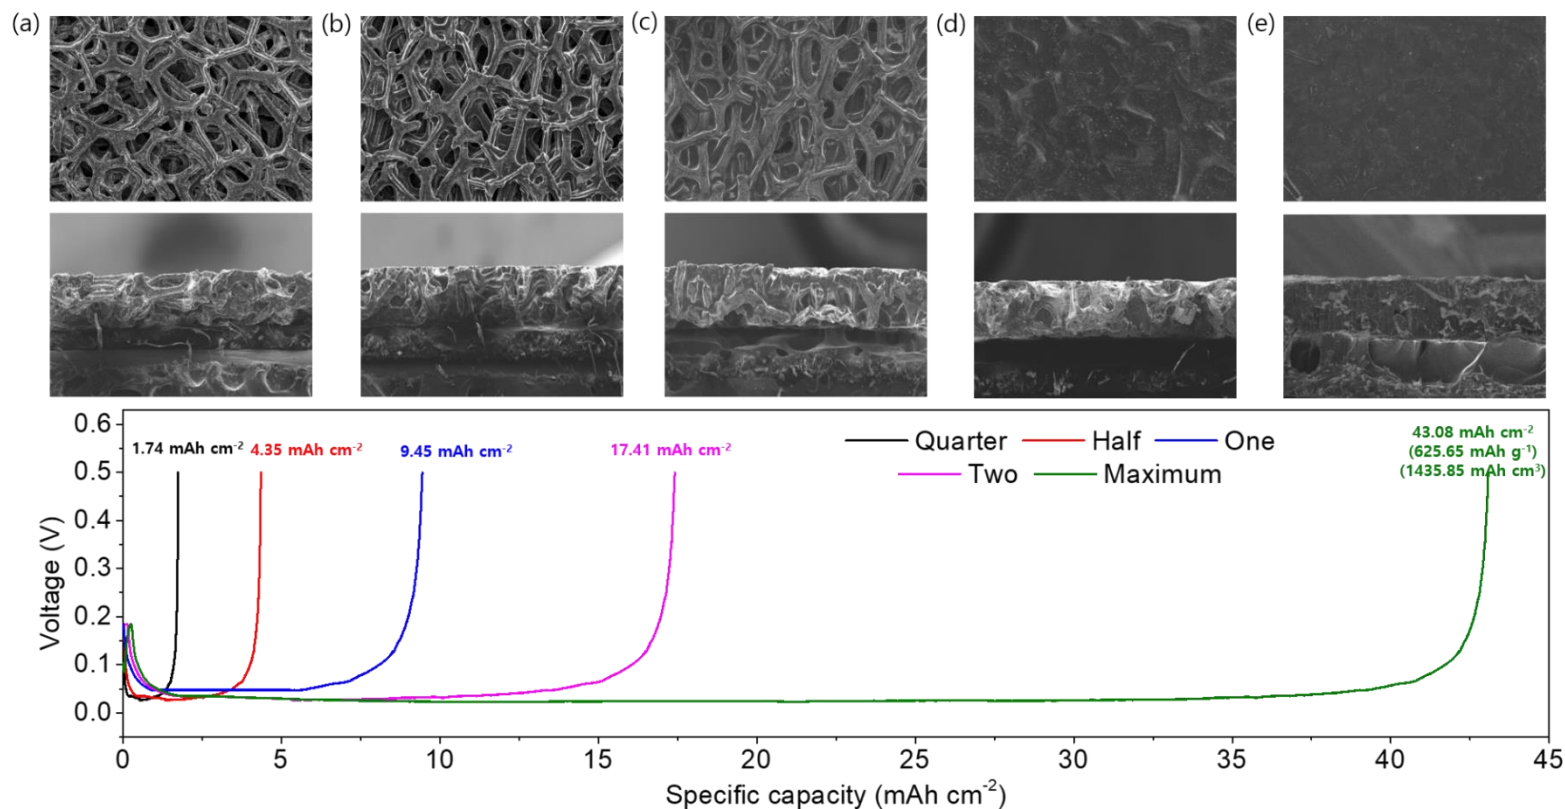

**Figure S10.** Top-view and cross-sectional images of t-3D-Li metal electrodes with different amounts of impregnated molten Li (measured in multiples/fractions of one bare Li foil with a diameter of 12 mm (0.03 g)). Images of Li<sub>2</sub>O@Cu foam impregnated using (a) one quarter, (b) one half, (c) one, (d) two Li foils and (e) excess Li. The Cu<sub>x</sub>O@Cu foam sample had a width and length of 2 cm and a thickness of 300  $\mu$ m. The cutoff voltage was set at 0.5 V. (Note: The gravimetric and volumetric capacity calculated by total weight and volume of t-3D-Li metal including the Cu foam exhibit specific capacities of 625.65 mAh g<sup>-1</sup> and 1,435.85 mAh cm<sup>-3</sup>, respectively, shown in the green curve. Comparing theoretical capacity of pristine Li metal (2,061 mAh cm<sup>-3</sup>) with the volumetric capacity of the excessive Li impregnated t-3D-Li metal (1,435.85 mAh cm<sup>-3</sup>), we can know that the porosity of the Cu foam is 69.6%. As a standard areal capacity for electrochemical test, The areal capacity of 1.0 mAh cm<sup>-2</sup> is corresponding to volumetric capacity of 33.33 mAh cm<sup>-3</sup> owing to the thickness of Cu foam (here, i.e. 300  $\mu$ m). Therefore, the volumetric capacity of 33.33 mAh cm<sup>-3</sup> matches with pore occupation of 2.32% of the t-3D-Li metal.)

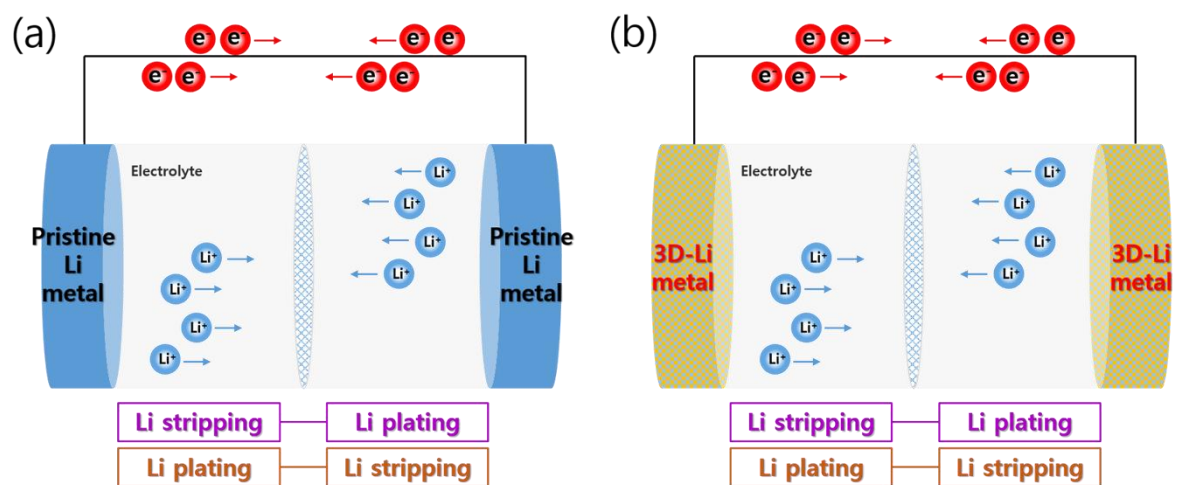

**Figure S11.** Configuration of the symmetric cell with (a) pristine Li and (b) 3D-Li metal for galvanostatic cycling.

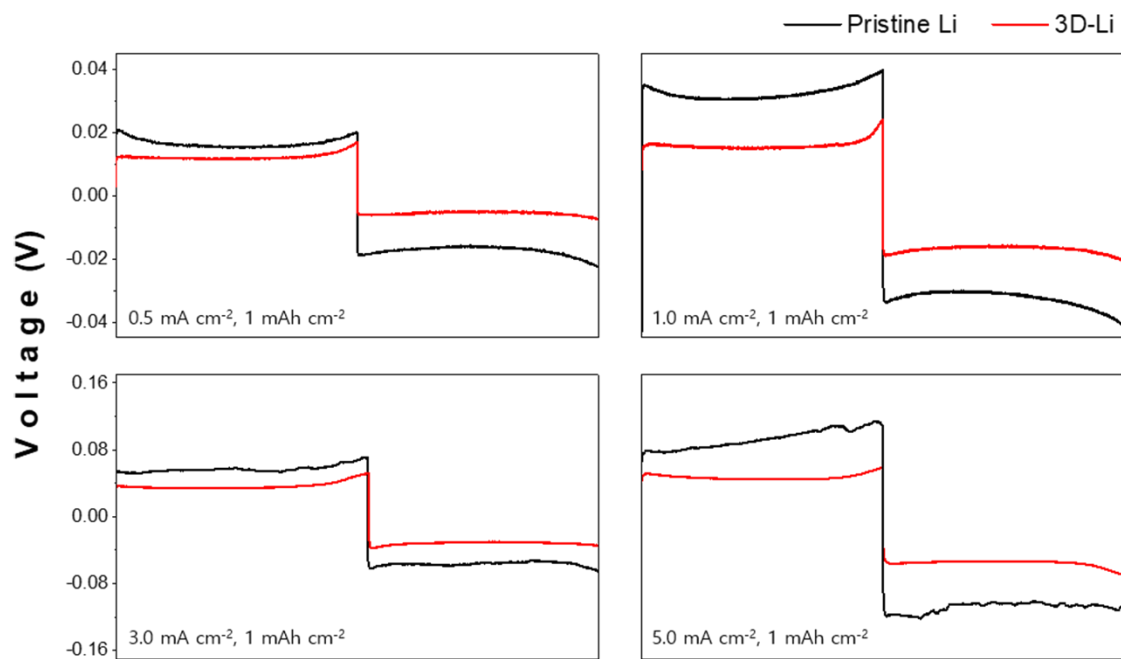

**Figure S12.** Expanded voltage profiles (corresponding to blue dashed rectangles in Fig. 7) of symmetric cells comprising pristine Li and 3D-Li metal electrodes.

**Table S1.** Inherent coefficients of each materials for Shomate equation.

| (550K) | Cu        | Li <sub>2</sub> O | Cu <sub>2</sub> O | CuO       | Molten Li |
|--------|-----------|-------------------|-------------------|-----------|-----------|
| A      | 17.72891  | 68.6971           | 59.42033          | 48.56494  | 32.46972  |
| B      | 28.0987   | 5.467149          | 37.84767          | 7.498607  | -2.635975 |
| C      | -31.25289 | 23.18308          | -26.45083         | -0.05598  | -6.327128 |
| D      | 13.97243  | -9.495631         | 11.07609          | 0.013851  | 4.230359  |
| E      | 0.068611  | -1.60244          | -0.54218          | -0.760082 | 0.005686  |
| F      | -6.056591 | -625.0352         | -191.7109         | -173.4272 | -7.117319 |
| G      | 47.89592  | 109.3928          | 151.0177          | 94.85128  | 74.29361  |
| H      | 0         | -598.7304         | -170.7072         | -156.0632 | 2.380002  |

**Table S2.** Thermodynamic parameters of each materials calculated by Shomate equation.

|                   | Enthalpy    | Entropy      | Gibbs free energy            |
|-------------------|-------------|--------------|------------------------------|
|                   | (H, kJ/mol) | (S, J/mol·K) | (G <sub>550K</sub> , kJ/mol) |
| Cu                | 6.4059      | 48.9125      | -20.4960                     |
| Li <sub>2</sub> O | -544.4125   | 71.6612      | -583.8268                    |
| O <sub>2</sub>    | 7.6507      | 223.6550     | -115.3596                    |
| Cu <sub>2</sub> O | -151.4258   | 132.0277     | -224.0410                    |
| CuO               | -145.4399   | 68.6776      | -183.2126                    |
| Liquid Li         | 7.6979      | 52.7193      | -21.2977                     |

**Table S3.** The determination of the spontaneity of the three kinds of chemical reactions based on difference of difference of Gibbs free energy.

|       | Formula                                                                                | $\Delta G_{\text{Rxn}} = \sum G_{550\text{K}}(\text{products}) - \sum G_{550\text{K}}(\text{reactants})$                                         | Value of $\Delta G_{\text{Rxn}}$ |
|-------|----------------------------------------------------------------------------------------|--------------------------------------------------------------------------------------------------------------------------------------------------|----------------------------------|
| Rxn ① | $\text{CuO} + 2\text{Liquid Li} \rightarrow \text{Cu} + \text{Li}_2\text{O}$           | $\Delta G_{\text{Rxn}} = [\text{G}(\text{Cu}) + \text{G}(\text{Li}_2\text{O})] - [\text{G}(\text{CuO}) + 2\text{G}(\text{Liquid Li})]$           | -378.5141                        |
| Rxn ② | $\text{Cu}_2\text{O} + 2\text{Liquid Li} \rightarrow 2\text{Cu} + \text{Li}_2\text{O}$ | $\Delta G_{\text{Rxn}} = [2\text{G}(\text{Cu}) + \text{G}(\text{Li}_2\text{O})] - [\text{G}(\text{Cu}_2\text{O}) + 2\text{G}(\text{Liquid Li})]$ | -358.1817                        |

The spontaneity of a chemical reaction can be generally determined from the corresponding change of Gibbs free energy. In turn, Gibbs free energy is defined as  $H(T) - T \times S(T)$ , where  $H$  is enthalpy,  $T$  is absolute temperature, and  $S$  is entropy. The second law of thermodynamics implies that spontaneous phenomena are characterized by an increase of overall entropy ( $\Delta S > 0$ ), i.e., spontaneous reaction should feature negative changes of Gibbs free energy ( $\Delta G < 0$ ). To determine the Gibbs free energy of a certain material, one needs to know the corresponding enthalpy and entropy, which were herein calculated using the Shomate equation:<sup>[1]</sup>

$$\textcircled{1} \quad \text{Enthalpy } (H, \text{ kJ mol}^{-1}): H_{298.15}^{\circ} + A * t + \frac{Bt^2}{2} + \frac{Ct^3}{3} + \frac{Dt^4}{4} - \frac{E}{t} + F - H,$$

$$\textcircled{2} \quad \text{Entropy } (S, \text{ J mol}^{-1} \text{ K}^{-1}): A * \ln t + Bt + \frac{Ct^2}{2} + \frac{Ct^3}{3} + \frac{E}{2t^2} + G,$$

where  $t$  is temperature (K) divided by 1000, the shomate parameters are listed in Table S1 using a symbol of  $A$ ,  $B$ ,  $C$ ,  $D$ ,  $E$ ,  $F$ ,  $G$  and  $H$ . The calculated thermodynamic parameters are listed in Table S2. The  $\Delta G$  values under our experimental conditions ( $T = 550 \text{ K}$ ) were determined from the standard Gibbs free energies of each material. As shown in Table S3,  $\Delta G$  for a chemical reaction was defined as the difference between the sum of Gibbs free energies of all products and that of all reactants. Both the reduction of  $\text{Cu}_x\text{O}$  ( $x = 1, 2$ ) and the oxidation of molten Li were characterized by negative  $\Delta G$  values and were therefore spontaneous.



**Table S4.** Electrochemical impedances simulated from equivalent circuit curve of Cu foil, Cu foam and Li<sub>2</sub>O@Cu foam.

|                   | Cu foil        |                | Cu foam        |                | Li <sub>2</sub> O@Cu foam |                |
|-------------------|----------------|----------------|----------------|----------------|---------------------------|----------------|
|                   | R <sub>e</sub> | R <sub>i</sub> | R <sub>e</sub> | R <sub>i</sub> | R <sub>e</sub>            | R <sub>i</sub> |
| 1 <sup>st</sup>   | 3.077          | 17.983         | 3.214          | 6.439          | 3.232                     | 7.326          |
| 75 <sup>th</sup>  | 3.328          | 11.17          | 3.183          | 3.295          | 3.016                     | 2.272          |
| 150 <sup>th</sup> | 19.14          | 21.6           | 3.200          | 5.364          | 3.044                     | 2.878          |

**Table S5.** The specific values of Coulombic efficiency for each Cu substrates at higher current density of 1.0, 3.0 and 5.0 mA cm<sup>-2</sup>.

| Cycle                     | 1 <sup>st</sup>   | 10 <sup>th</sup> | 20 <sup>th</sup> | 30 <sup>th</sup> | 40 <sup>th</sup> | 50 <sup>th</sup> | 60 <sup>th</sup> | 70 <sup>th</sup> | 80 <sup>th</sup> | 90 <sup>th</sup> | 100 <sup>th</sup> |
|---------------------------|-------------------|------------------|------------------|------------------|------------------|------------------|------------------|------------------|------------------|------------------|-------------------|
| 1.0<br>mA/cm <sup>2</sup> | Cu foil           | 91.7 %           | 90.6 %           | 92.0 %           | 89.3 %           | 77.3 %           | -                | -                | -                | -                | -                 |
|                           | Cu foam           | 94.0 %           | 97.4 %           | 98.7 %           | 98.3 %           | 98.8 %           | 98.6 %           | 98.4 %           | 96.8 %           | 81.5 %           | -                 |
|                           | Li <sub>2</sub> O | 94.0 %           | 98.3%            | 99.4 %           | 99.6 %           | 99.3 %           | 99.1 %           | 99.2 %           | 99.2 %           | 99.0 %           | 98.8 %            |
|                           | @Cu foam          |                  |                  |                  |                  |                  |                  |                  |                  |                  | 99.0%             |
| Cycle                     | 1 <sup>st</sup>   | 10 <sup>th</sup> | 20 <sup>th</sup> | 30 <sup>th</sup> | 40 <sup>th</sup> | 50 <sup>th</sup> | 60 <sup>th</sup> | 70 <sup>th</sup> | 80 <sup>th</sup> | 90 <sup>th</sup> | 100 <sup>th</sup> |
| 3.0<br>mA/cm <sup>2</sup> | Cu foil           | 86.8 %           | 83.7 %           | 84.3 %           | 84.4 %           | 81.3 %           | 73.5 %           | -                | -                | -                | -                 |
|                           | Cu foam           | 84.1 %           | 96.6 %           | 97.3 %           | 97.4 %           | 97.4 %           | 96.9 %           | 93.2 %           | 86.9 %           | 77.1 %           | -                 |
|                           | Li <sub>2</sub> O | 88.4 %           | 96.0%            | 98.2 %           | 97.5 %           | 97.5 %           | 98.2 %           | 97.5 %           | 97.0 %           | 96.6 %           | 97.5 %            |
|                           | @Cu foam          |                  |                  |                  |                  |                  |                  |                  |                  |                  | 97.5%             |
| Cycle                     | 1 <sup>st</sup>   | 10 <sup>th</sup> | 20 <sup>th</sup> | 30 <sup>th</sup> | 40 <sup>th</sup> | 50 <sup>th</sup> | 60 <sup>th</sup> | 70 <sup>th</sup> | 80 <sup>th</sup> | 90 <sup>th</sup> | 100 <sup>th</sup> |
| 5.0<br>mA/cm <sup>2</sup> | Cu foil           | 85.9 %           | 80.4 %           | 85.7 %           | 92.7 %           | 92.0 %           | 77.4 %           | -                | -                | -                | -                 |
|                           | Cu foam           | 85.0 %           | 96.8 %           | 93.3 %           | 89.3 %           | 91.3 %           | 96.3 %           | 96.9 %           | 94.9 %           | 84.4 %           | -                 |
|                           | Li <sub>2</sub> O | 87.1 %           | 96.2 %           | 98.0 %           | 96.8 %           | 96.0 %           | 96.7 %           | 97.2 %           | 97.4 %           | 95.7 %           | 97.5 %            |
|                           | @Cu foam          |                  |                  |                  |                  |                  |                  |                  |                  |                  | 97.5%             |

**Table S6.** The comparison of Coulombic efficiency of porous current collector for Li metal anode with previous literatures

| Porous scaffold            | Lithiophilic agent         | Current density<br>(mA cm <sup>-2</sup> ) | Capacity<br>(mAh cm <sup>-2</sup> ) | CE     | Cycle | Reference |
|----------------------------|----------------------------|-------------------------------------------|-------------------------------------|--------|-------|-----------|
|                            |                            | 0.5                                       |                                     | 99.0 % | 150   |           |
| Cu foam                    | Li <sub>2</sub> O          | 1.0                                       | 1.0                                 | 99.0 % | 100   | This work |
|                            |                            | 3.0                                       |                                     | 97.5 % | 100   |           |
|                            |                            | 5.0                                       |                                     | 97.5 % | 100   |           |
|                            |                            |                                           |                                     |        |       |           |
| Cu foam                    | -<br>(Mechanical pressing) | 0.5                                       | 1.0                                 | 93.8 % | 100   | [2]       |
| Porous Cu foil             | X<br>(Not Li impregnated)  | 0.5                                       | 1.0                                 | 98.5 % | 50    | [3]       |
| Porous Cu foil             | X<br>(Not Li impregnated)  | 0.5                                       | 1.0                                 | 97.0 % | 250   | [4]       |
|                            |                            | 1.0                                       |                                     |        | 140   |           |
| Graphene flake             | X<br>(Not Li impregnated)  | 0.5                                       | 0.5                                 | 93.0 % | 50    | [5]       |
|                            |                            | 2.0                                       | 1.0                                 | 90.0 % |       |           |
| Cu nanowire film           | X<br>(Not Li impregnated)  | 1.0                                       | 2.0                                 | 98.6 % | 200   | [6]       |
| Cu-CuO-Ni hybrid structure | CuO                        | 3.0                                       | 0.5                                 | 90.0 % | 100   | [7]       |
| Ni foam                    | -<br>(Mechanical pressing) | 1.0                                       | 1.0                                 | 85.0 % | 100   | [8]       |
| Graphene@Ni foam           | X<br>(Not Li impregnated)  | 0.5                                       | 1.0                                 | 98.0 % | 100   | [9]       |
|                            |                            | 1.0                                       |                                     | 92.0 % |       |           |
| CuO nanosheets on Cu foil  | CuO                        | 0.5                                       |                                     |        |       | [10]      |
|                            |                            | 1.0                                       | 1.0                                 | 94.0 % | 180   |           |

## References:

- 1 NIST Chemistry WebBook, NIST Standard Reference Database Number 69, National Institute of Standards and Technology, Gaithersburg, MD, 2005, **20899** (<http://webbook.nist.gov>).
- 2 Q. Li, S. Zhu, Y. Lu, *Adv. Funct. Mater.* 2017, **27**, 1606422-1606429.
- 3 C.-P. Yang, Y.-X. Yin, S.-F. Zhang, N.-W. Li, Y.-G. Guo, *Nat. Commun.* 2015, **6**, 8058-8065.
- 4 Q. Yun, Y.-B. He, W. Lv, Y. Zhao, B. Li, F. Kang, Q.-H. Yang, *Adv. Mater.* 2016, **28**, 6932-6939.
- 5 R. Zhang, X.-B. Cheng, C.-Z. Zhao, H.-J. Peng, J.-L. Shi, J.-Q. Huang, J. Wang, F. Wei, Q. Zhang, *Adv. Mater.* 2016, **28**, 2155-2162.
- 6 L.-L. Lu, J. Ge, J.-N. Yang, S.-M. Chen, H.-B. Yao, F. Zhou, S.-H. Yu, *Nano Lett.* 2016, **16**, 4431-4437.
- 7 S. Wu, Z. Zhang, M. Lan, S. Yang, J. Cheng, J. Cai, J. Shen, Y. Zhu, K. Zhang, W. Zhang, *Adv. Mater.* 2018, **30**, 1705830-1705836.
- 8 S. S. Chi, Y. Liu, W. L. Song, L. Z. Fan, Q. Zhang, *Adv. Funct. Mater.* 2017, **27**, 1700348-1700357.
- 9 K. Xie, W. Wei, K. Yuan, W. Lu, M. Guo, Z. Li, Q. Song, X. Liu, J.-G. Wang, C. Shen, *ACS Appl. Mater. Interfaces* 2016, **8**, 26091-26097.
- 10 C. Zhang, W. Lv, G. Zhou, Z. Huang, Y. Zhang, R. Lyu, H. Wu, Q. Yun, F. Kang, Q.-H. Yang, *Adv. Energy Mater.* 2018, **8**, 1703404-1703411.
